# Supplementary material for: A closer look at the taxonomic and genetic diversity of endemic South African Marphysa Quatrefages, 1865
Source: PeerJ. 2023 Dec 18;11:e16665. doi: 10.7717/peerj.16665 (PMC10734438; doi:10.7717/peerj.16665)
Supplement: Supplemental Information 2 [file peerj-11-16665-s002.xlsx]

## Sheet: Marphysa_new_GB submission1
Sequence_ID	Specimen_voucher - Museum	Organism	Collected_by	Collection date	Country	isolation_source	GenBank ID
PS1	MB-A095266	Treadwellphysa izinqa	J.Kara	2019-08-30	South Africa:Port Shepstone	mucuos-sand burrows	OQ836443
PS2	MB-A095267	Treadwellphysa izinqa	J.Kara	2019-08-30	South Africa:Port Shepstone	mucuos-sand burrows	OQ836444
PS3	MB-A095268	Treadwellphysa izinqa	J.Kara	2019-08-30	South Africa:Port Shepstone	mucuos-sand burrows	OQ836445
PS4	MB-A095269	Treadwellphysa izinqa	J.Kara	2019-08-30	South Africa:Port Shepstone	mucuos-sand burrows	OQ836446
PS5	MB-A095270	Treadwellphysa izinqa	J.Kara	2019-08-30	South Africa:Port Shepstone	mucuos-sand burrows	OQ836447
PS6	MB-A095271	Treadwellphysa izinqa	J.Kara	2019-08-30	South Africa:Port Shepstone	mucuos-sand burrows	OQ836448
PS7	MB-A095272	Treadwellphysa izinqa	J.Kara	2019-08-30	South Africa:Port Shepstone	mucuos-sand burrows	OQ836449
PS8	MB-A095273	Treadwellphysa izinqa	J.Kara	2019-08-30	South Africa:Port Shepstone	mucuos-sand burrows	OQ836450
PS9	MB-A095274	Treadwellphysa izinqa	J.Kara	2019-08-30	South Africa:Port Shepstone	mucuos-sand burrows	OQ836451
PS10	MB-A095275	Treadwellphysa izinqa	J.Kara	2019-08-30	South Africa:Port Shepstone	mucuos-sand burrows	OQ836452
PS11	MB-A095276	Treadwellphysa izinqa	J.Kara	2019-08-30	South Africa:Port Shepstone	mucuos-sand burrows	OQ836453
PS12	MB-A095277	Treadwellphysa izinqa	J.Kara	2019-08-30	South Africa:Port Shepstone	mucuos-sand burrows	OQ836454
PS13	MB-A095278	Treadwellphysa izinqa	J.Kara	2019-08-30	South Africa:Port Shepstone	mucuos-sand burrows	OQ836455
PS14	MB-A095279	Treadwellphysa izinqa	J.Kara	2019-08-30	South Africa:Port Shepstone	mucuos-sand burrows	OQ836456
UR5	MB-A095280	Treadwellphysa izinqa	J.Kara	2019-09-19	South Africa: Umhlanga Rocks	mucuos-sand burrows	OQ836457
UR6	MB-A095281	Treadwellphysa izinqa	J.Kara	2019-09-19	South Africa: Umhlanga Rocks	mucuos-sand burrows	OQ836458
UR7	MB-A095282	Treadwellphysa izinqa	J.Kara	2019-09-19	South Africa: Umhlanga Rocks	mucuos-sand burrows	OQ836459
UR10	MB-A095283	Treadwellphysa izinqa	J.Kara	2019-09-19	South Africa: Umhlanga Rocks	mucuos-sand burrows	OQ836460
UR14	MB-A095284	Treadwellphysa izinqa	J.Kara	2019-09-19	South Africa: Umhlanga Rocks	mucuos-sand burrows	OQ836461
UR21	MB-A095285	Treadwellphysa izinqa	J.Kara	2019-09-19	South Africa: Umhlanga Rocks	mucuos-sand burrows	OQ836462
UR24	MB-A095286	Treadwellphysa izinqa	J.Kara	2019-09-19	South Africa: Umhlanga Rocks	mucuos-sand burrows	OQ836463
UR28	MB-A095288	Treadwellphysa izinqa	J.Kara	2019-09-19	South Africa: Umhlanga Rocks	mucuos-sand burrows	OQ836464
UR30	MB-A095289	Treadwellphysa izinqa	J.Kara	2019-09-19	South Africa: Umhlanga Rocks	mucuos-sand burrows	OQ836465
UR33	MB-A095290	Treadwellphysa izinqa	J.Kara	2019-09-19	South Africa: Umhlanga Rocks	mucuos-sand burrows	OQ836466
UR34	MB-A095291	Treadwellphysa izinqa	J.Kara	2019-09-19	South Africa: Umhlanga Rocks	mucuos-sand burrows	OQ836467
RB1	MB-A095292	Marphysa mzingazia	J.Kara	2019-09-01	South Africa: Richards Bay	Muddy rock crevices	OQ836468
RB18	MB-A095293	Marphysa mzingazia	J.Kara	2019-09-01	South Africa: Richards Bay	Muddy rock crevices	OQ836469
RB19	MB-A095294	Marphysa mzingazia	J.Kara	2019-09-01	South Africa: Richards Bay	Muddy rock crevices	OQ836470
RB20	MB-A095295	Marphysa mzingazia	J.Kara	2019-09-01	South Africa: Richards Bay	Muddy rock crevices	OQ836471
RB23	MB-A095296	Marphysa mzingazia	J.Kara	2019-09-01	South Africa: Richards Bay	Muddy rock crevices	OQ836472
RB24	MB-A095297	Marphysa mzingazia	J.Kara	2019-09-01	South Africa: Richards Bay	Muddy rock crevices	OQ836473
